# Supplementary material for: pH- and redox-responsive self-assembly of amphiphilic hyperbranched poly(amido amine)s for controlled doxorubicin delivery
Source: Royal Society of Chemistry journal article supplement (doi:10.1039/c4bm00410h), 2015-01-01
Supplement: c4bm00410h1.pdf [file c4bm00410h1.pdf]

ARTICLE

## pH- and redox- responsive self-assembly of amphiphilic hyperbranched poly(amido amine)s for controlled doxorubicin delivery

Weiren Cheng, Jatin Nitin Kumar, Yong Zhang, Ye Liu\*

### SUPPORTING INFORMATION

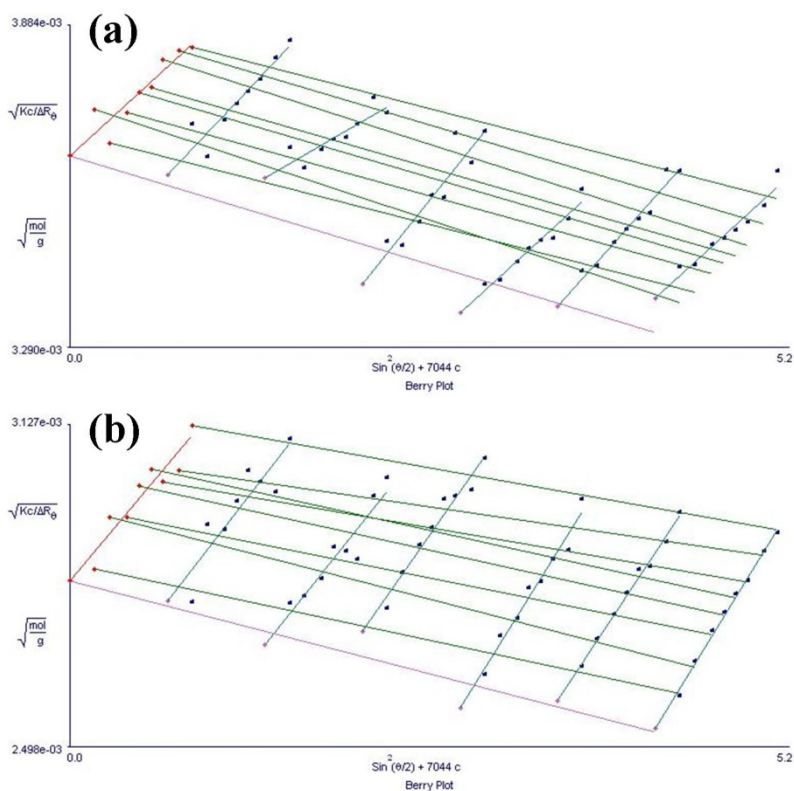

**Figure S1.** Zimm plots of a) amino-terminated hyperbranched poly(BAC2-AMPD1); b) hyperbranched poly(BAC2-AMPD1)-PEG in methanol.

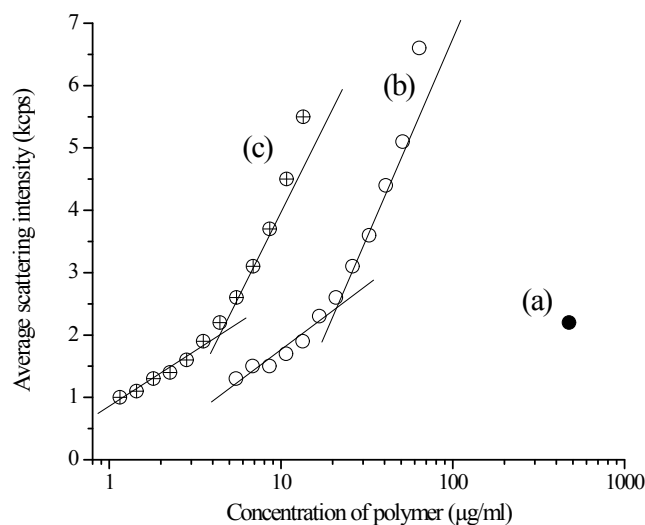

**Figure S2.** Relationship between the average scattering intensity from DLS measurements and the concentration of hyperbranched poly(BAC2-AMPD1)-PEG ( $\mu\text{g}/\text{mL}$ ) in deionized water, a) hyperbranched poly(BAC2-AMPD1)-PEG dissolved in deionized directly; b) micelles of hyperbranched poly(BAC2-AMPD1)-PEG; c) DOX loaded micelles of hyperbranched poly(BAC2-AMPD1)-PEG.

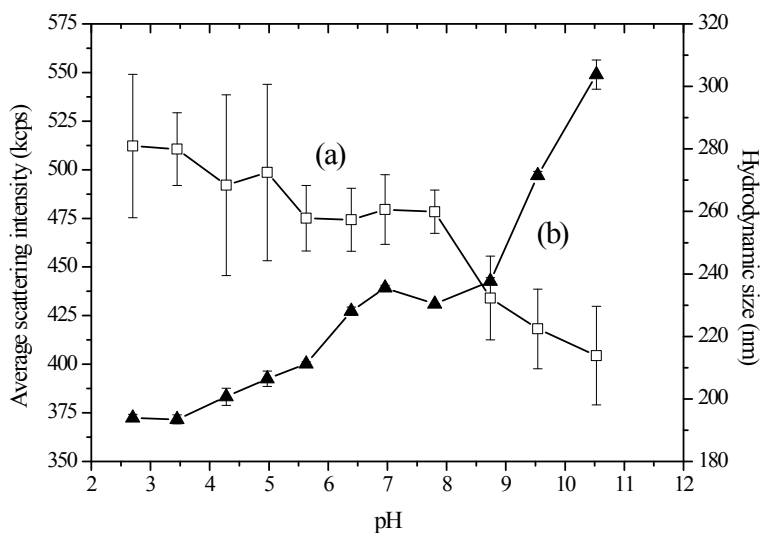

**Figure S3.** pH dependent a) hydrodynamic size; b) average scattering intensity from DLS measurement, of micelles of hyperbranched poly(BAC2-AMPD1)-PEG. All data represent mean  $\pm$  SD ( $n = 3$ ).

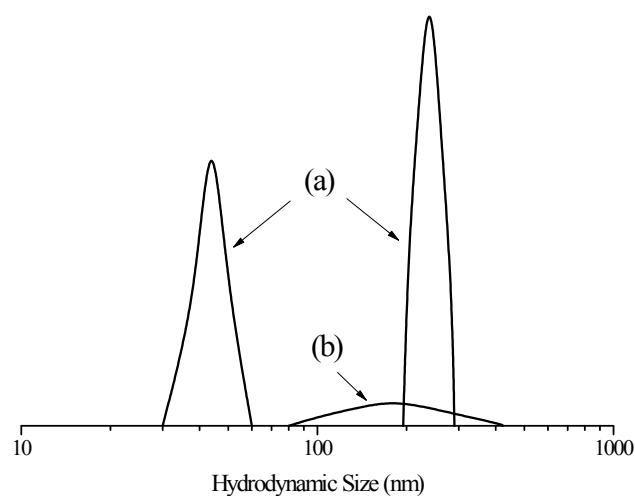

**Figure S4.** Hydrodynamic size distribution of 0.5 mg/mL of micelles of hyperbranched poly(BAC2-AMPD1)-PEG in the presence of 10 mM GSH, a) before incubation; b) 15 min post incubation at 37 °C. (Normalized intensity)

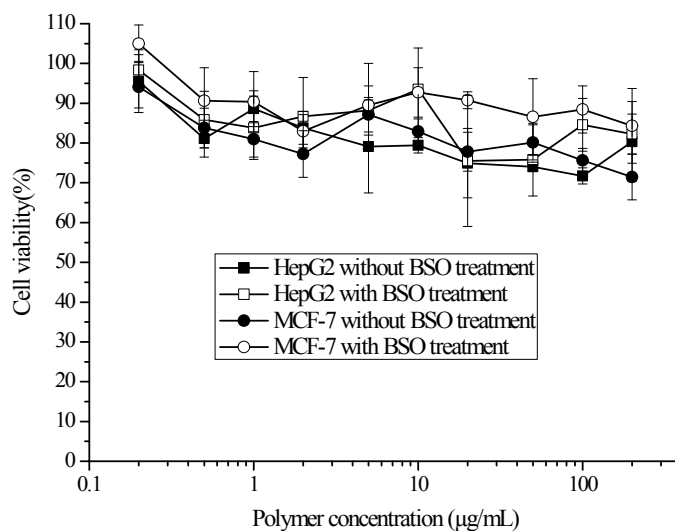

**Figure S5.** *in vitro* cytotoxicity of hyperbranched poly(BAC2-AMPD1)-PEG in HepG2 and MCF-7 without or with BSO treatment. All data represent mean  $\pm$  SD. (n = 3).
